# Supplementary material
Source: PubMed Central journal article supplement (PMC3595435)

Fig. S13 Panel B

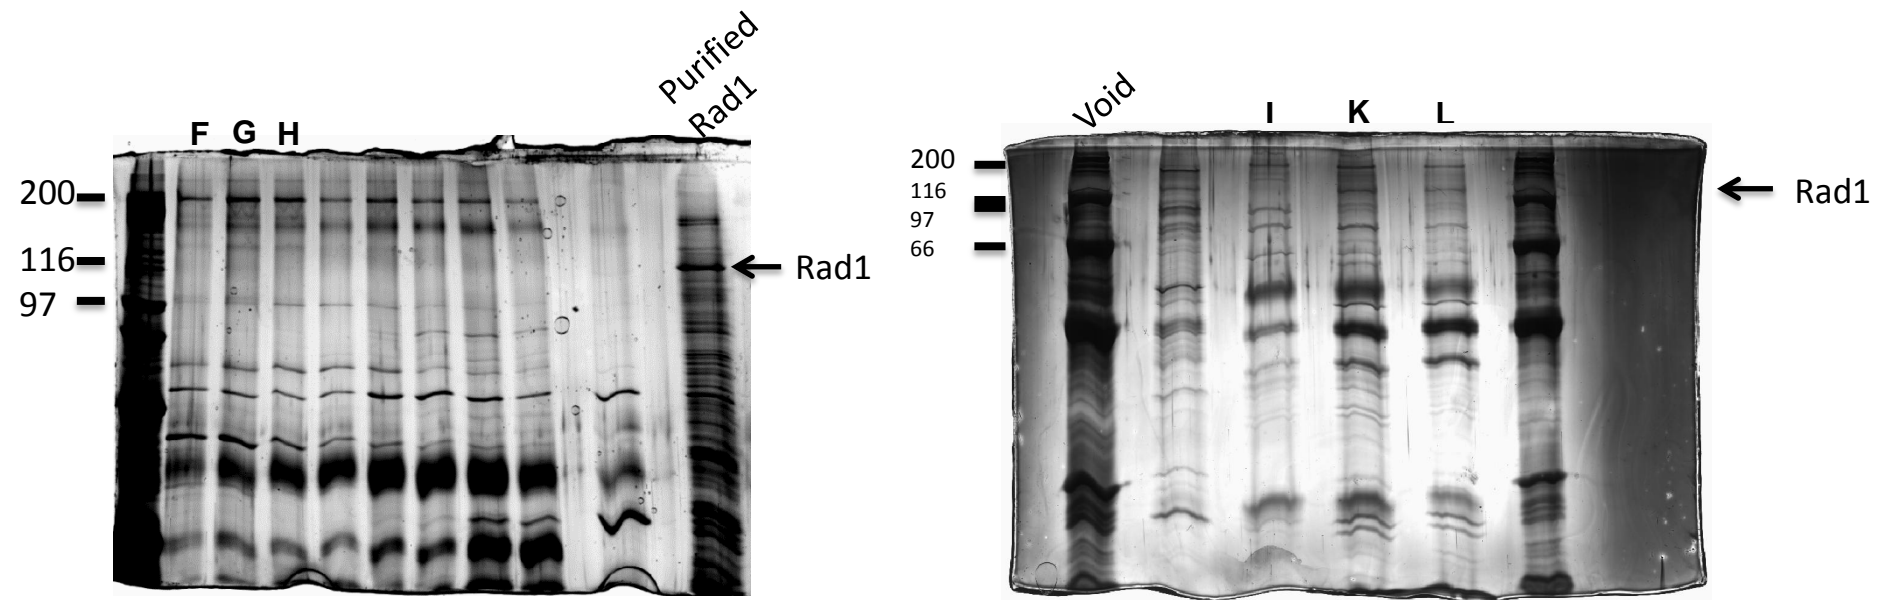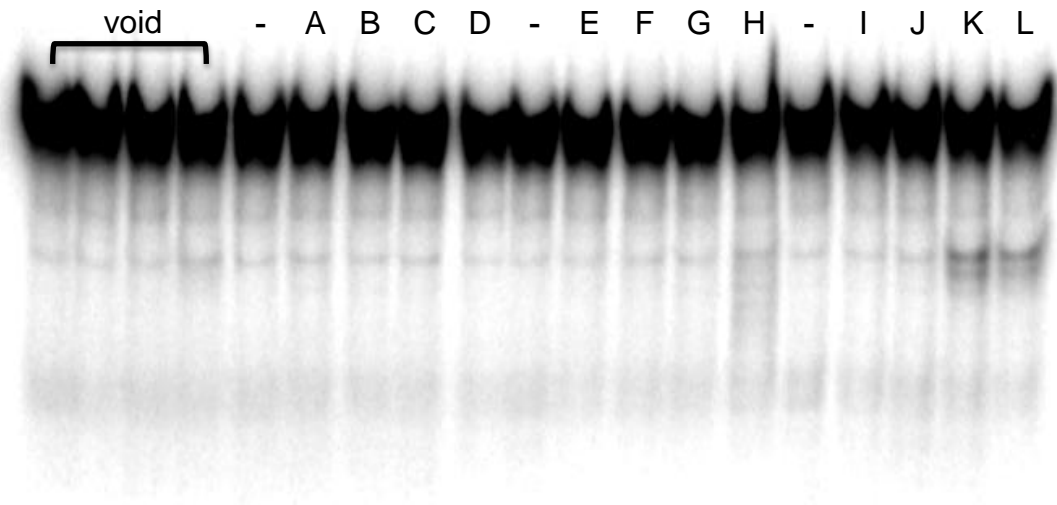

Supplement: emboj2012345dfs13b.pdf [file emboj2012345dfs13b.pdf]

Fig. S13 Panel D

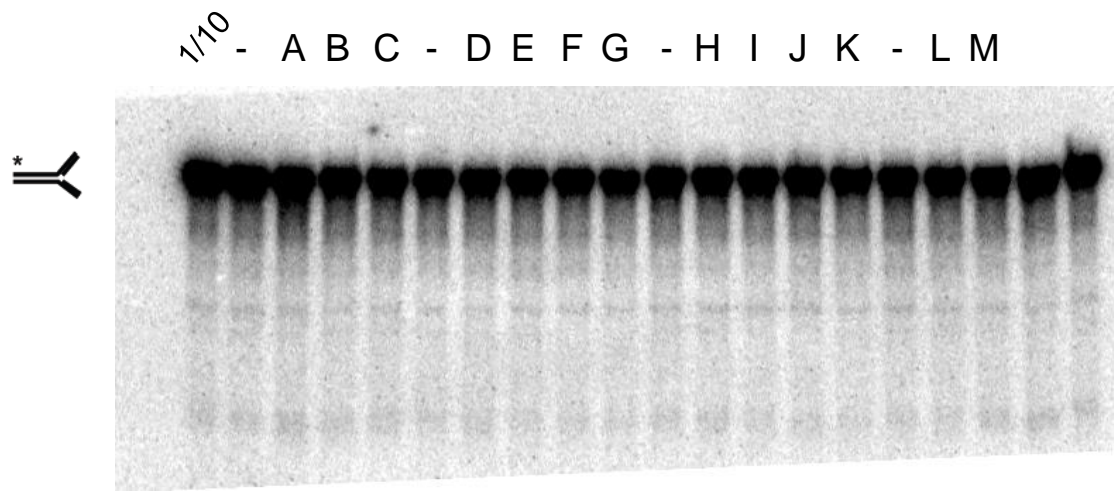

Supplement: emboj2012345dfs13d.pdf [file emboj2012345dfs13d.pdf]

Fig. S1 Panel A

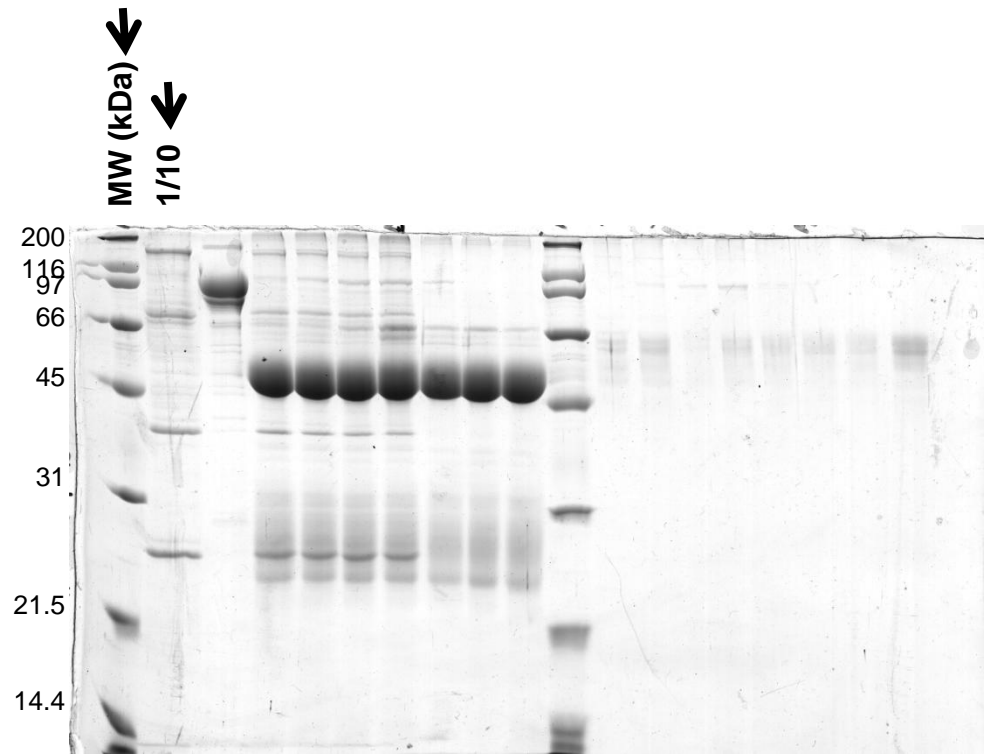

Supplement: emboj2012345dfs1a.pdf [file emboj2012345dfs1a.pdf]
